# Supplementary material
Source: PubMed Central journal article supplement (PMC6112010)
Supplement: zjb999094858s3.pdf [file zjb999094858s3.pdf]

A

BAB1\_0914 and BAB2\_0512

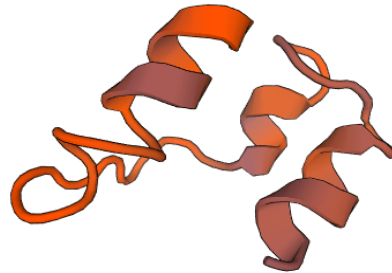

B

BAB2\_0574

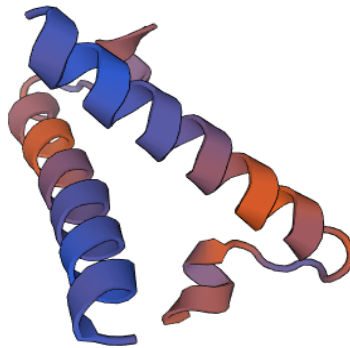

1

2 **Figure S1. Predicted protein structures of BAB1\_0914, BAB2\_0512, and BAB2\_0574.**

3 Protein structure homology-modelling as depicted by the free online server SWISS-MODEL for

4 BAB1\_0914 and BAB2\_0512 (A) and BAB2\_0574 (B).

5

6

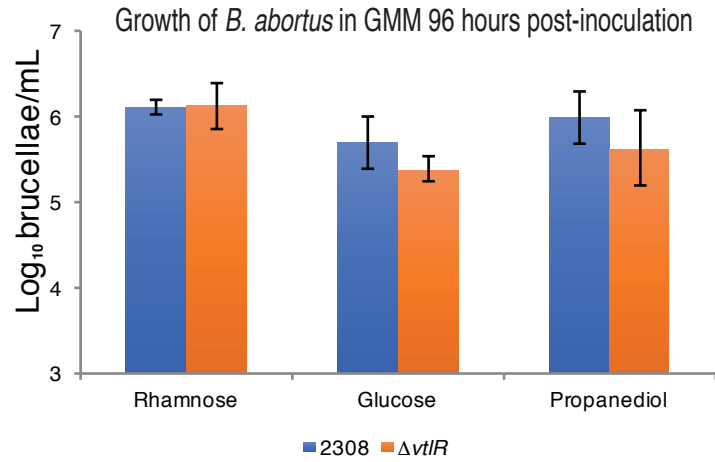

7

8 **Figure S2. *B. abortus* 2308:: $\Delta vtIR$  sensitivity to L-rhamnose, D-glucose, and propanediol.**

9 *B. abortus* 2308:: $\Delta vtIR$  growth 96 hours post-inoculation in GMM in the presence of 24 mM L-

10 rhamnose, D-glucose, or propanediol.

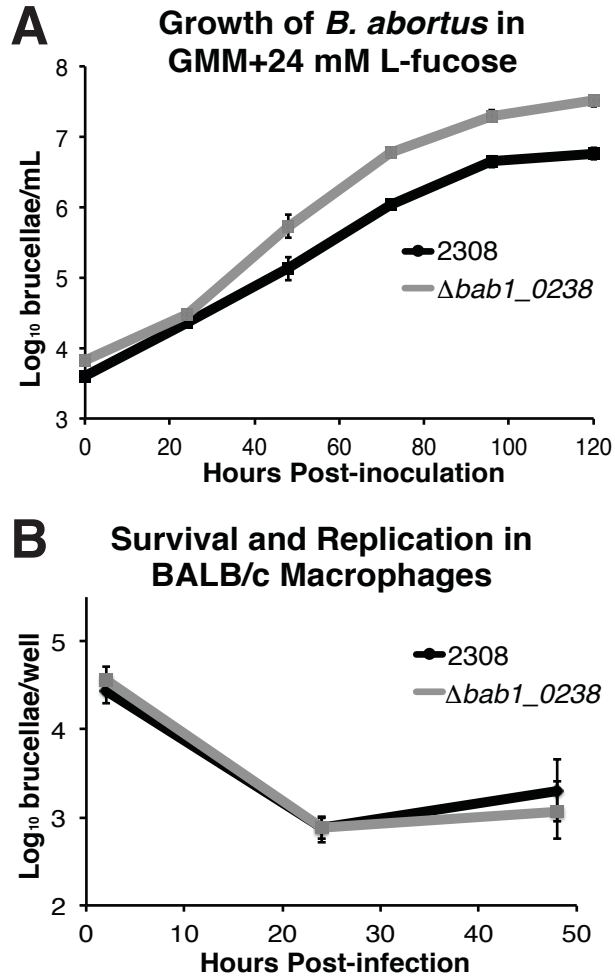

11  
 12 **Figure S3. Growth kinetics and virulence of *B. abortus* 2308 and *B. abortus***  
 13 **2308::Δ*bab1\_0238*** . A. Growth of *B. abortus* strains in Gerhardt's minimal medium (GMM) +  
 14 24 mM L-fucose. Cultures of (GMM) supplemented with and without the addition of 24 mM L-  
 15 fucose were inoculated with *Brucella* strains at an initial concentration of  $\sim 5 \times 10^3$  CFU/ml and  
 16 incubated at 37°C. Samples were collected and serial diluted to calculate Log<sub>10</sub> brucellae/mL  
 17 every 24 hours.  
 18 B. Macrophage survival and replication experiments. Primary peritoneal macrophages from  
 19 BALB/c mice were infected with *B. abortus* 2308 or the isogenic *bab1\_0238* deletion strain  
 20 (Δ*bab1\_0238*). Macrophages were lysed 2, 24, and 48 hours post-infection, and the number of  
 21 intracellular brucellae was determined by serial dilution and plating on agar medium.

22  
23

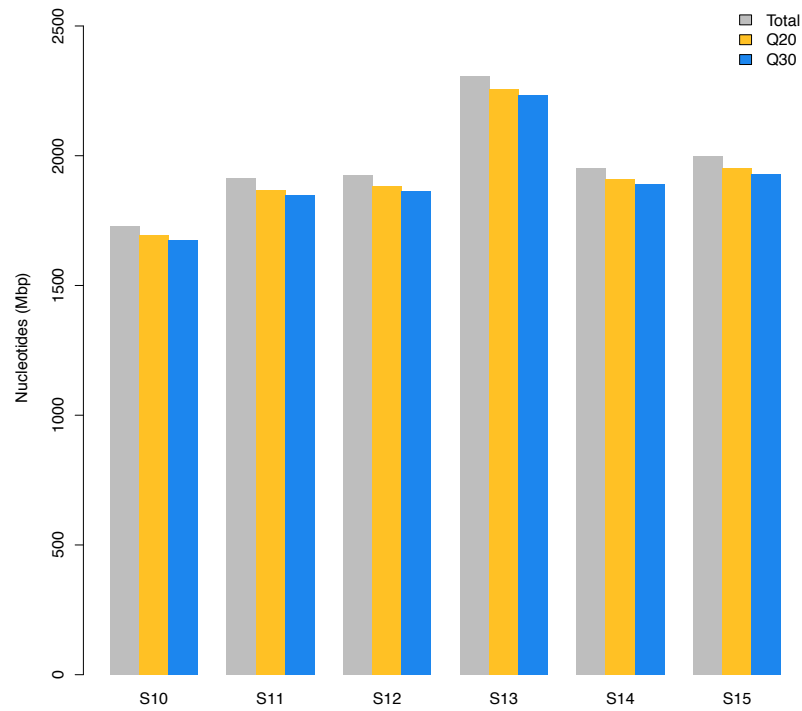

24  
25 **Figure S4. Sequencing summary after quality control.** Bars in different colors represent  
26 nucleotides from all (Total, grey) sequencing quality greater than or equal to 20 (Q20, yellow),  
27 and sequencing quality greater than or equal to 30 (Q30, blue). Samples S10-S12: 3 replicates of  
28 *B. abortus* 2308 cultured in GMM; S13-S15: 3 replicates of *B. abortus* 2308 cultured in GMM -  
29 Fucose (100  $\mu$ M).

30
